# Supplementary material for: The Effect of Multiple Single Nucleotide Polymorphisms in the Folic Acid Pathway Genes on Homocysteine Metabolism
Source: Hindawi journal article supplement (doi:10.1155/2014/560183), 2014-01-01

Supplementary Table 1 Primer Sequence of 18 SNPs of Genes in the Folic Acid Pathway

| SNP       | forward primer                  | reverse primer                 | extend primer           |
|-----------|---------------------------------|--------------------------------|-------------------------|
| rs9606756 | ACGTTGGATGCCTGTGACCTCATTTGTACC  | ACGTTGGATGCCAACTTCTCTACCAGATG  | cGCTGCCATCTCTGGTA       |
| rs2851391 | ACGTTGGATGAGGATGGACCCTTCGGGAT   | ACGTTGGATGGAATATCGAGGCATGTCCAG | ctCGCCCTCTGCAGATCA      |
| rs3737965 | ACGTTGGATGAGGAGCTGGTAAGAAGCCG   | ACGTTGGATGACCCCGCAACGCCTCTCT   | CGCCTCTCTCAGTCC         |
| rs3733890 | ACGTTGGATGTTGTTGCAGTCAGGAGTGTG  | ACGTTGGATGAGTGAAGTCATGAAGGAGG  | ggggaGGCTTGGAGGCTGCC    |
| rs2287780 | ACGTTGGATGGAATATTCTGGTTTACCCC   | ACGTTGGATGGAAAACTTCCTTACCTGGC  | CTTACCTGGCCAAGAG        |
| rs162036  | ACGTTGGATGGGAGCTGTGCAGTAAACAAG  | ACGTTGGATGGGAGGAGATCCAACAAGCAG | aACAGGCATCTCGTACAAAGC   |
| rs2236225 | ACGTTGGATGCACTAACCTACAAACCCTTC  | ACGTTGGATGATCGCACATGGCAATTCCTC | ttcaTCCATCATTGCAGACC    |
| rs1979277 | ACGTTGGATGGGAGGAGGTTGAGAGCTTC   | ACGTTGGATGCTCCTTTAGAAGTCAGGCAG | cagaCAGGCAGAGGGAAGA     |
| rs1805087 | ACGTTGGATGCTTTGAGGAAATCATGGAAG  | ACGTTGGATGTCTACCACTTACCTTGAGAG | gtcCCTTGAGAGACTCATAATGG |
| rs1801394 | ACGTTGGATGGCAGAAAAATCCATGTACCAC | ACGTTGGATGCTATATGCTACACAGCAGGG | AAGCCATCGCAGAAGAAAT     |
| rs1801198 | ACGTTGGATGTTCTCTCTCTCTCTCTCAC   | ACGTTGGATGAGACATGCTGTCCAGTTC   | cgCCCAGTTCTGCCCA        |
| rs1801131 | ACGTTGGATGCTTGAAGGAGAAGGTGTCTG  | ACGTTGGATGCTTCAAAAGCGGAAGAATG  | TGCGTGATGATGAAATCG      |
| rs1801133 | ACGTTGGATGTGAAGAGCAAGTCCCCAAG   | ACGTTGGATGCCGAGAGGTAAAGAACGAAG | GAAGACTTCAAAGACTT       |
| rs1051266 | ACGTTGGATGCGTAGAAGCAAAGGTAGCAC  | ACGTTGGATGAGAAGCAGGTGCCCGTGAA  | gactAGCTCCGGTCTTGGCGGC  |
| rs234713  | ACGTTGGATGACAGAGAAAGCTGTGGGTG   | ACGTTGGATGTTCTGCCTCCCTCCGAAC   | tgcaTCCCTCCGAACACTTG    |
| rs2303080 | ACGTTGGATGCACAGCATCAGGCTGTAC    | ACGTTGGATGTAAAAGAGAGACTGCGTCC  | gtAAAAATAAAGCAGACACAA   |

Supplementary Table 2 Age Differences Among Different SNP Genotypes

|           | wide type |            | heterozygous |            | homozygous |             | P     |
|-----------|-----------|------------|--------------|------------|------------|-------------|-------|
|           | N         | age        | N            | age        | N          | age         |       |
| rs1801133 | 132       | 28.18±3.77 | 170          | 28.50±3.33 | 83         | 29.23±3.96  | 0.118 |
| rs1801131 | 265       | 28.50±3.60 | 108          | 28.69±3.76 | 11         | 27.91±3.45  | 0.756 |
| rs1051266 | 73        | 29.22±3.56 | 209          | 28.31±3.45 | 100        | 28.61±4.00  | 0.178 |
| rs1801394 | 213       | 28.64±3.66 | 150          | 28.35±3.76 | 21         | 28.76±2.30  | 0.725 |
| rs1805087 | 311       | 28.55±3.66 | 68           | 28.60±3.45 | 3          | 31.67±4.5   | 0.334 |
| rs2303080 | 316       | 28.50±3.55 | 61           | 28.98±4.15 | 4          | 426.25±0.96 | 0.285 |
| rs2236225 | 212       | 28.55±3.71 | 146          | 28.50±3.57 | 26         | 28.96±3.48  | 0.837 |
| rs1801198 | 340       | 28.58±3.74 | 43           | 28.42±2.75 | 0          | 28.56±3.64  | 0.945 |
| rs2851391 | 198       | 28.82±3.99 | 148          | 28.26±3.21 | 37         | 28.35±3.31  | 0.542 |
| rs3733890 | 183       | 28.81±4.00 | 165          | 28.30±3.16 | 31         | 28.45±3.91  | 0.422 |
| rs2287780 | 256       | 28.53±3.54 | 117          | 28.81±3.88 | 8          | 26.5±1.20   | 0.206 |
| rs162036  | 245       | 28.45±3.66 | 124          | 28.82±3.46 | 13         | 28.54±4.89  | 0.654 |
| rs9606756 | 372       | 28.54±3.59 | 13           | 28.85±5.0  | 0          | -           | 0.764 |
| rs234713  | 363       | 28.59±3.69 | 22           | 27.91±2.67 | 0          | -           | 0.397 |
| rs3737965 | 330       | 28.55±3.61 | 53           | 28.45±3.87 | 2          | 31.5±3.54   | 0.510 |

Comparisons between different SNP genotypes and age using  $\chi^2$  test

Values are presented as mean  $\pm$  SD

Supplementary Table 3 The Differences in Gestational Weeks Among Different SNP Genotypes

|           | wide type |                   | heterozygous |                   | homozygous |                   | P     |
|-----------|-----------|-------------------|--------------|-------------------|------------|-------------------|-------|
|           | N         | gestational weeks | N            | gestational weeks | N          | gestational weeks |       |
| rs1801133 | 128       | 16.41±2.39        | 168          | 16.04±2.24        | 81         | 16.23±2.10        | 0.383 |
| rs1801131 | 254       | 16.22±2.25        | 105          | 16.10±2.30        | 11         | 16.91±2.39        | 0.529 |
| rs1051266 | 70        | 16.19±2.51        | 204          | 16.05±2.02        | 94         | 16.53±2.58        | 0.240 |
| rs1801394 | 204       | 16.18±2.33        | 143          | 16.22±2.22        | 20         | 16.40±2.04        | 0.912 |
| rs1805087 | 304       | 16.22±2.34        | 61           | 16.20±1.96        | 3          | 16.67±2.52        | 0.941 |
| rs2303080 | 304       | 16.13±2.29        | 60           | 16.42±1.90        | 3          | 18.33±4.04        | 0.17  |
| rs2236225 | 206       | 16.05±2.11        | 138          | 16.48±2.54        | 26         | 16.12±1.90        | 0.228 |
| rs1801198 | 27        | 16.25±2.23        | 42           | 15.95±2.58        | 0          | –                 | 0.418 |
| rs2851391 | 194       | 16.30±2.12        | 140          | 15.96±2.48        | 35         | 16.60±2.00        | 0.219 |
| rs3733890 | 175       | 15.95±2.07        | 161          | 16.29±2.27        | 30         | 16.97±2.88        | 0.051 |
| rs2287780 | 245       | 16.07±2.24        | 115          | 16.43±2.19        | 7          | 16.57±3.21        | 0.33  |
| rs162036  | 235       | 16.37±2.25        | 121          | 15.91±2.13        | 12         | 16.58±3.70        | 0.193 |
| rs9606756 | 359       | 16.21±2.26        | 12           | 16.33±2.57        | 0          | –                 | 0.852 |
| rs234713  | 351       | 16.25±2.28        | 20           | 15.55±1.88        | 0          | –                 | 0.179 |
| rs3737965 | 317       | 16.20±2.26        | 52           | 16.27±2.34        | 2          | 17.00±2.27        | 0.867 |

Supplementary Table 4 The Differences in Pregnancies among Different SNP Genotypes

|           | wide type |             | heterozygous |             | homozygous |             | P     |
|-----------|-----------|-------------|--------------|-------------|------------|-------------|-------|
|           | N         | pregnancies | N            | pregnancies | N          | pregnancies |       |
| rs1801133 | 131       | 1.57±0.94   | 170          | 1.58±0.83   | 83         | 1.76±1.04   | 0.268 |
| rs1801131 | 264       | 1.63±0.96   | 108          | 1.58±0.82   | 11         | 1.55±0.69   | 0.866 |
| rs1051266 | 73        | 1.70±0.89   | 209          | 1.62±0.97   | 99         | 1.54±0.80   | 0.505 |
| rs1801394 | 213       | 1.60±0.87   | 149          | 1.62±0.96   | 21         | 1.76±1.14   | 0.726 |
| rs1805087 | 312       | 1.57±0.87   | 66           | 1.85±1.11   | 3          | 1.33±0.58   | 0.172 |
| rs2303080 | 315       | 1.63±0.94   | 61           | 1.56±0.83   | 4          | 1.00±0.00   | 0.260 |
| rs2236225 | 212       | 1.59±0.84   | 145          | 1.66±1.01   | 26         | 1.62±1.02   | 0.874 |
| rs1801198 | 339       | 1.61±0.92   | 43           | 1.65±0.90   | 0          | -           | 0.575 |
| rs2851391 | 199       | 1.64±0.90   | 147          | 1.56±0.93   | 36         | 1.67±0.81   | 0.730 |
| rs3733890 | 182       | 1.67±0.94   | 165          | 1.56±0.93   | 31         | 1.58±0.77   | 0.544 |
| rs2287780 | 255       | 1.66±0.99   | 117          | 1.56±0.77   | 8          | 1.12±0.35   | 0.230 |
| rs162036  | 244       | 1.59±0.91   | 124          | 1.66±0.87   | 13         | 1.77±1.42   | 0.654 |
| rs9606756 | 371       | 1.61±0.91   | 13           | 1.62±1.20   | 0          | -           | 0.997 |
| rs234713  | 364       | 1.61±0.90   | 22           | 1.70±1.26   | 0          | -           | 0.669 |
| rs3737965 | 329       | 1.62±0.93   | 53           | 1.62±0.181  | 2          | 1.00±0.00   | 0.636 |

Supplementary Table 5

## The Differences in Parity Among Different SNP Genotypes

|           | wide type |           | heterozygous |           | homozygous |           | P      |
|-----------|-----------|-----------|--------------|-----------|------------|-----------|--------|
|           | N         | parities  | N            | parities  | N          | parities  |        |
| rs1801133 | 131       | 0.07±0.25 | 170          | 0.09±0.28 | 83         | 0.13±0.34 | 0.284  |
| rs1801131 | 264       | 0.09±0.29 | 108          | 0.09±0.29 | 11         | 0.00±0.00 | 0.567  |
| rs1051266 | 73        | 0.11±0.32 | 209          | 0.10±0.30 | 99         | 0.07±0.26 | 0.658  |
| rs1801394 | 213       | 0.08±0.28 | 149          | 0.10±0.30 | 21         | 0.10±0.30 | 0.870  |
| rs1805087 | 312       | 0.08±0.28 | 66           | 0.14±0.35 | 3          | 0.00±0.00 | 0.344  |
| rs2303080 | 315       | 0.10±0.29 | 61           | 0.08±0.28 | 4          | 0.00±0.00 | 0.773  |
| rs2236225 | 212       | 0.09±0.29 | 145          | 0.08±0.28 | 26         | 0.12±0.33 | 0.2848 |
| rs1801198 | 339       | 0.09±0.28 | 43           | 0.12±0.32 | 0          | -         | 0.553  |
| rs2851391 | 199       | 0.08±0.27 | 147          | 0.10±0.30 | 36         | 0.11±0.32 | 0.614  |
| rs3733890 | 182       | 0.09±0.29 | 165          | 0.08±0.28 | 31         | 0.13±0.34 | 0.739  |
| rs2287780 | 255       | 0.10±0.30 | 117          | 0.09±0.28 | 8          | 0.00±0.00 | 0.614  |
| rs162036  | 244       | 0.07±0.26 | 124          | 0.13±0.34 | 13         | 0.08±0.28 | 0.219  |
| rs9606756 | 371       | 0.09±0.29 | 13           | 0.15±0.38 | 0          | -         | 0.426  |
| rs234713  | 364       | 0.09±0.29 | 20           | 0.10±0.31 | 0          | -         | 0.888  |
| rs3737965 | 329       | 0.09±0.28 | 53           | 0.11±0.32 | 2          | 0.00±0.00 | 0.762  |

Supplementary Table 6. Relationship Between the SNP Scores and Residual Hcy

| effective valuables                                                               | training data           | cross-validation        |
|-----------------------------------------------------------------------------------|-------------------------|-------------------------|
|                                                                                   | correlation coefficient | correlation coefficient |
| MTHFR( rs 1801133)                                                                | 0.231                   | 0.161                   |
| MTHFR (rs 1801133/rs3733965)                                                      | 0.256                   | 0.221                   |
| MTHFR (rs 1801133/rs3733965)/CBS(rs234713)                                        | 0.261                   | 0.226                   |
| MTHFR (rs 1801133/rs3733965)/ CBS (rs234713)/<br>BHMT(rs3737890)                  | 0.27                    | 0.242                   |
| MTHFR (rs 1801133/rs3733965)/ CBS (rs234713)/<br>BHMT(rs3737890)/MTHFR(rs1801131) | 0.275                   | 0.247                   |

Hcy : homocysteine; SNP: single nucleotide polymorphisms; SVM: support vector machine

Supplementary Figure 1. The Relationship Between Folic Acid and Hcy Concentration.

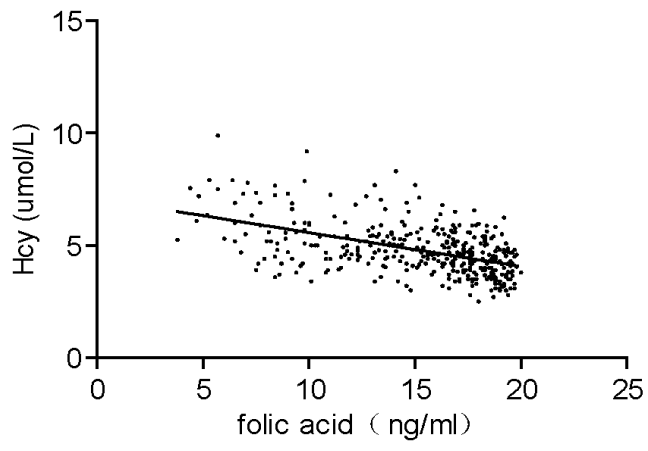

Supplement: f1 [file 560183.f1.pdf]
